# Supplementary material for: Piezoelectric polarizations and valley-related multiple Hall effects in TiAlX 3 monolayers (X = Se, Te)
Source: Royal Society of Chemistry journal article supplement (doi:10.1039/d4tc03559c), 2024-01-01
Supplement: d4tc03559c1.pdf [file d4tc03559c1.pdf]

## Supporting Information for

# Piezoelectric polarizations and valley-related multiple Hall effect in monolayer $\text{TiAlX}_3$ (X=Se, Te)

Jia Li<sup>a\*</sup>, Jianke Tian<sup>b</sup>, Hengbo Liu<sup>b</sup>, Yan Li<sup>b</sup>, Linyang Li<sup>b</sup>, Jun Li<sup>b</sup>, Guodong Liu<sup>b</sup>,  
Junjie Shi<sup>c</sup>

*<sup>a</sup>College of Science, Civil Aviation University of China, Tianjin 300300, People's  
Republic of China*

*<sup>b</sup>School of Science, Hebei University of Technology, Tianjin 300401, People's  
Republic of China*

*<sup>c</sup>State Key Laboratory for Artificial Microstructures and Mesoscopic Physics, School  
of Physics, Peking University Yangtze Delta Institute of Optoelectronics, Peking  
University, 5 Yiheyuan Street, Beijing, 100871, People's Republic of China.*

---

\* Corresponding author. *E-mail address:* lijia@cauc.edu.cn (J. Li).

**Table. S1.** The MAE ( $\mu eV$ ), energy difference between AFM1, AFM2, AFM3 and FM ordering ( $meV/unit\ cell$ ), the Heisenberg exchange parameters  $J_1$  and  $J_2$  (meV) and  $T_c$  (K) for  $TiAlSe_3$  and  $TiAlTe_3$  monolayers.

| <i>material</i> | <i>MAE</i> | $\Delta E_{AFM}$ | $\Delta E_{AFM}$ | $\Delta E_{AFM}$ | $J_1$ | $J_2$ |
|-----------------|------------|------------------|------------------|------------------|-------|-------|
| $TiAlSe_3$      | 43         | 34.06            | 14.27            | 29.11            | 4.40  | -0.39 |
| $TiAlTe_3$      | 468        | 23.61            | 8.42             | 13.58            | 7.80  | -1.79 |

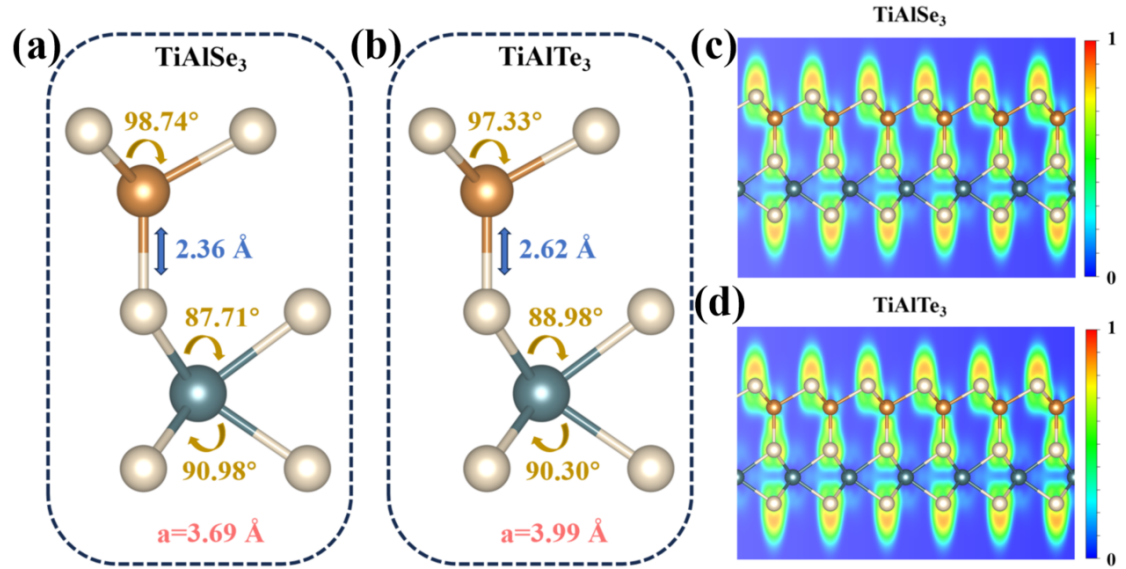

**Fig. S1.** The graphic representation of a unit cell with structural properties for (a)  $TiAlSe_3$  and (b)  $TiAlTe_3$  monolayers. The electron localization function of (c)  $TiAlSe_3$  and (d)  $TiAlTe_3$ .

Under compressive strain, there are small negative frequencies (less than  $0.50 \text{ cm}^{-1}$ ) at  $\Gamma$  point (along  $\Gamma\text{M}$  direction), which are provided by out-of-plane acoustic mode (ZA). Previous studies have shown that the lattice dynamics calculations based on DFPT have a persistent problem of non-vanishing frequencies of acoustic modes. This negative frequency could be caused by phonon-magnetic coupling or strong electron correlations and such a small value of negative frequencies can be ignored and thus the structure can be considered to be dynamically stable.

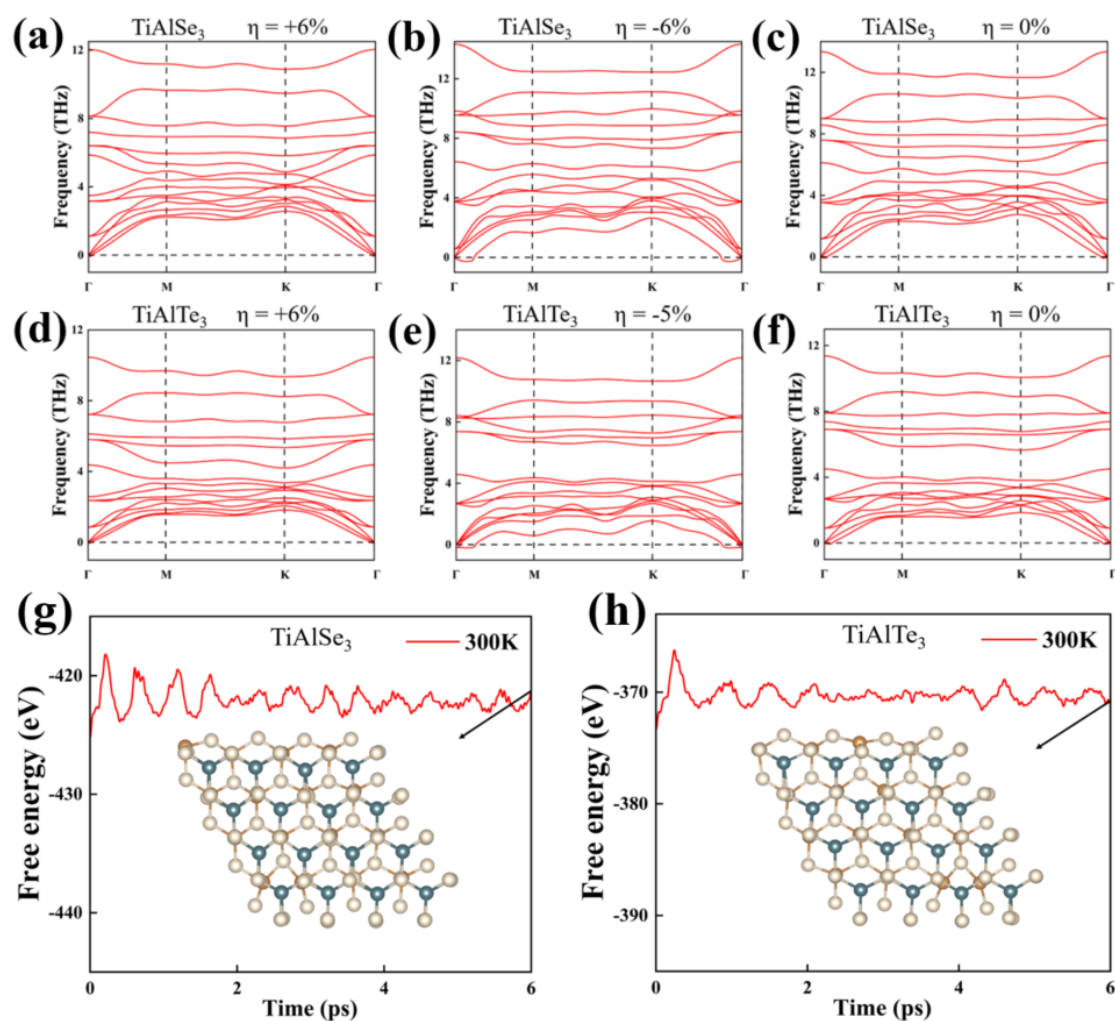

**Fig. S2.** (a)-(f) Biaxial strain-dependent phonon spectra of TiAlSe<sub>3</sub> and TiAlTe<sub>3</sub>. The fluctuation of total energy and snapshots of geometric structures for (g) TiAlSe<sub>3</sub> and (h) TiAlTe<sub>3</sub> at 6 ps from AIMD simulations.

The breaking of inversion symmetry results in an unequal charge transfer, which is reflected by the drop of averaged potential and electrostatic potential gradient. The asymmetric average electrostatic potential along the z-axis shows the out-of-plane dipole moment and the inherent electric field  $k$  of system can be obtained from the slope of the plane average electrostatic potential between the outermost atoms. The intrinsic polarization implied by large out-of-plane dipole moment and the inherent electric field indicates the possible existence of good piezoelectric properties.

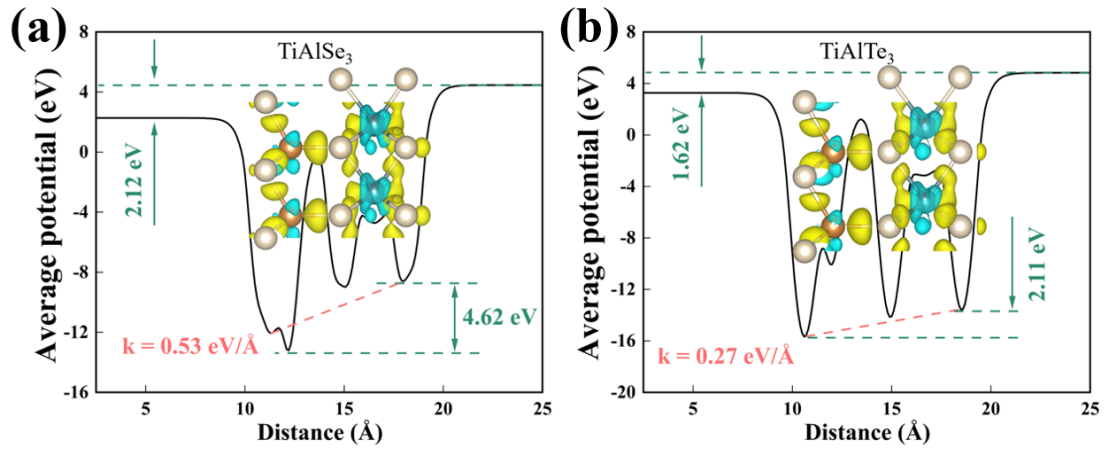

FIG. S3. The planar average electrostatic potential energy of  $\text{TiAlSe}_3$  and  $\text{TiAlTe}_3$ .

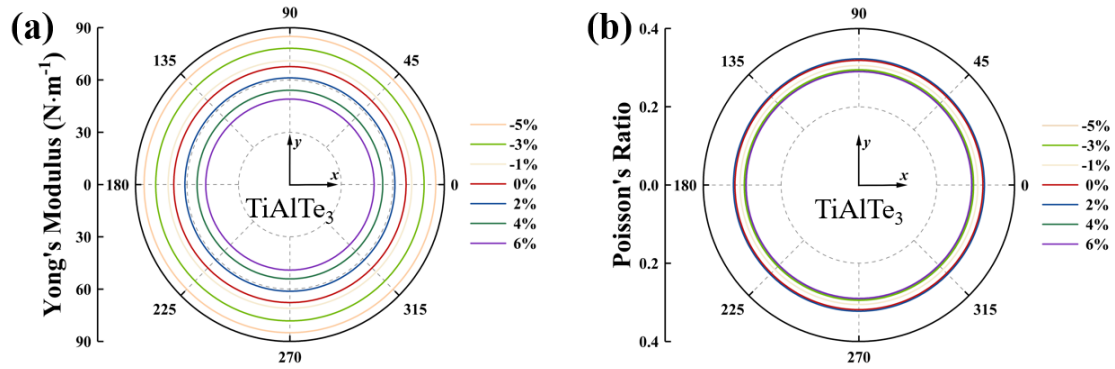

Fig. S4. (a) The Young's modulus and (b) Poisson's ratio for  $\text{TiAlTe}_3$

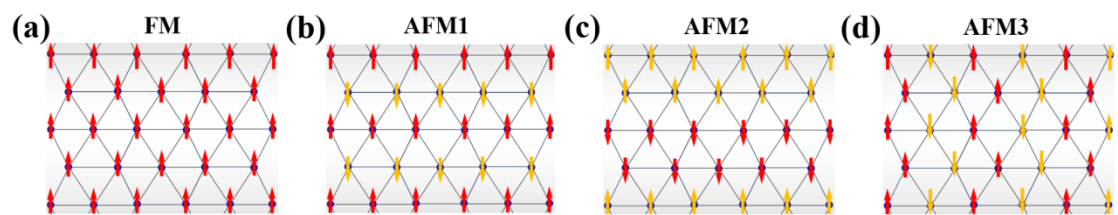

**Fig. S5.** (a) FM, (b) AFM1, (c) AFM2 and (d) AFM3 states of crystal structures, and the red (orange) arrow shows the direction of spin-up (spin-down).

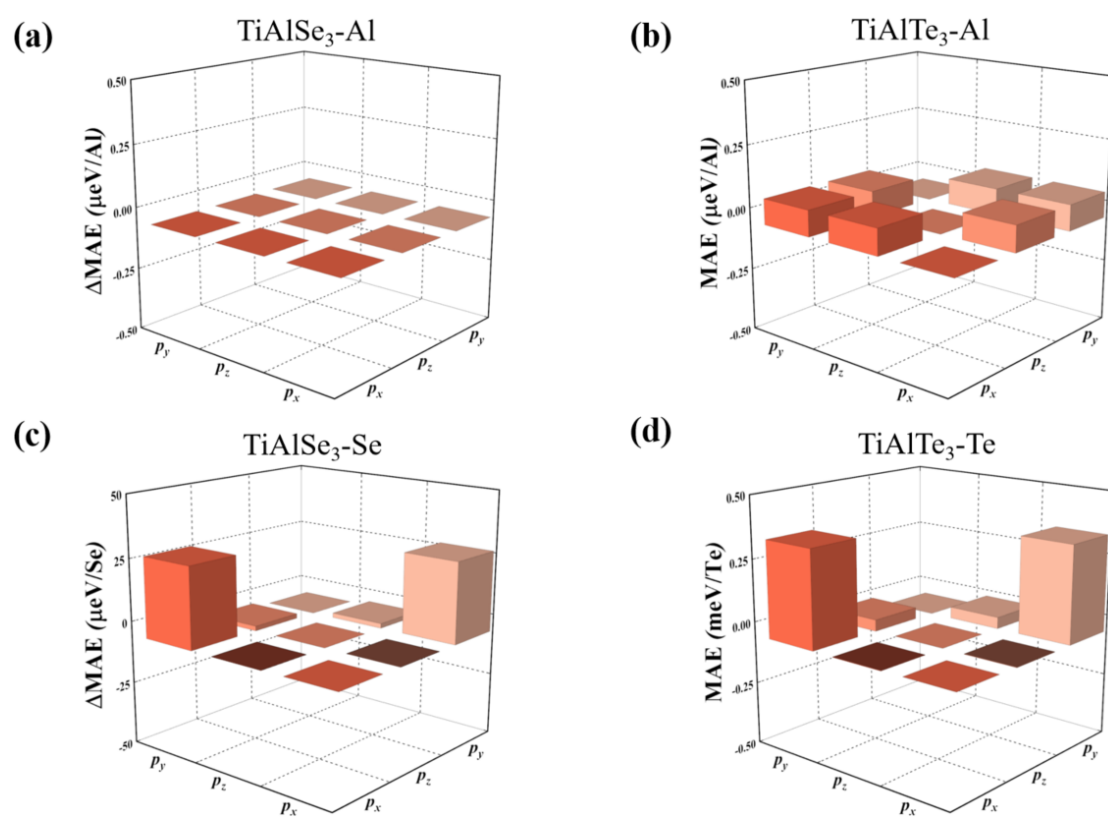

**Fig. S6.** The orbital-resolved MAE of (a),(b) Al and (a),(d) X atoms for  $\text{TiAlX}_3$ .

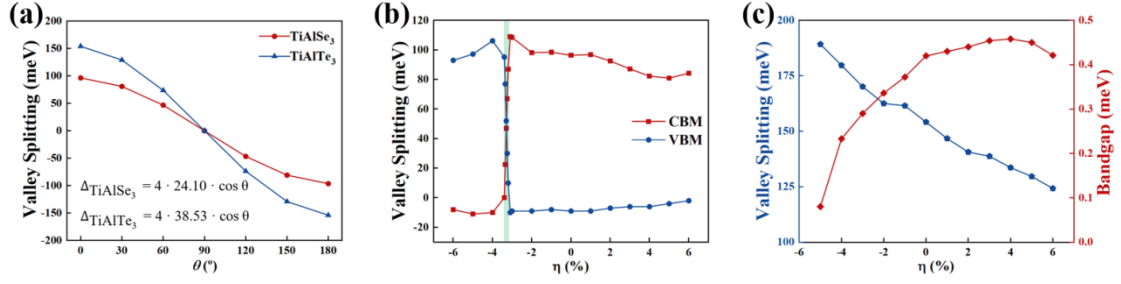

**Fig. S7.** (a) Valley polarization as the function of magnetization direction for TiAlSe<sub>3</sub> and TiAlTe<sub>3</sub>, and the function is the corresponding cosine function. (b) Valley polarization in CBM and VBM of TiAlSe<sub>3</sub> under different biaxial strain. (c) Valley polarization in CBM and bandgap of TiAlTe<sub>3</sub> under different biaxial strain.

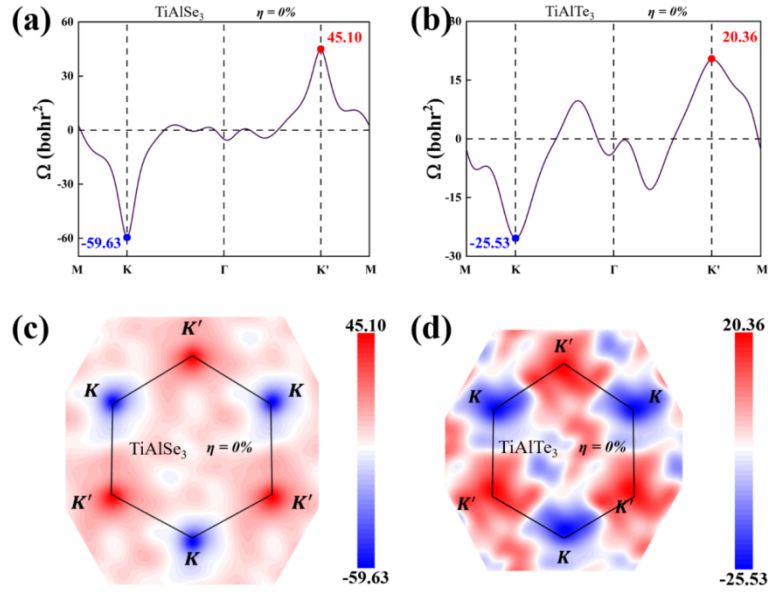

**Fig. S8.** (a) and (b) The Berry curvatures  $\Omega(k)$  as the curve along the high-symmetry path with the unit of Bohr<sup>2</sup> for TiAlSe<sub>3</sub> and TiAlTe<sub>3</sub> monolayers. (c)-(d) Contour map of Berry curvatures in the  $k$  space for TiAlSe<sub>3</sub> and TiAlTe<sub>3</sub> monolayers.

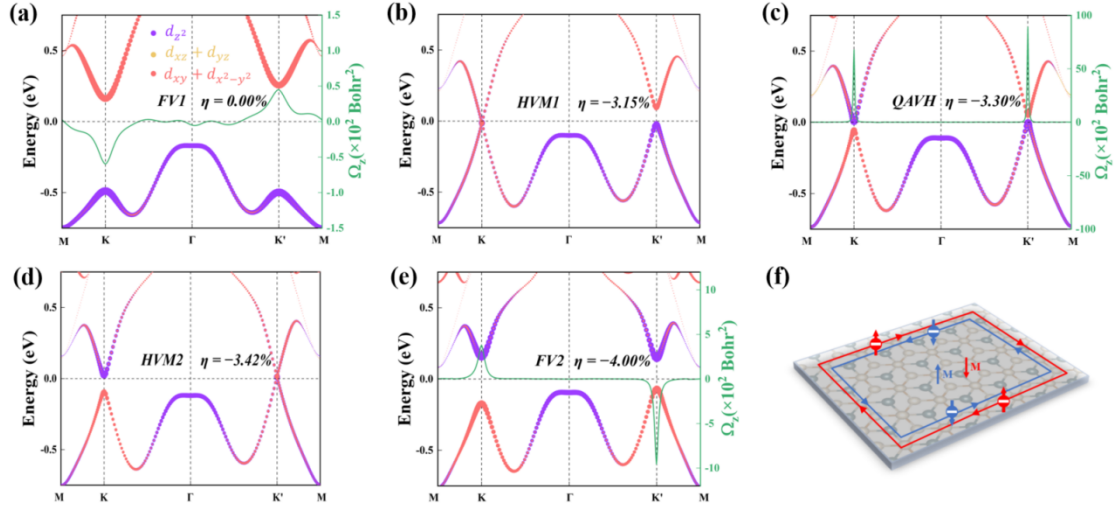

**Fig. S9.** (a)-(e) are the diagrams of the evolution of the electronic band structures with biaxial strains, and the green curves denote the Berry curvatures of the corresponding system. (f) Schematic diagram of QAVHE in  $\text{TiAlSe}_3$ . The red and blue represent the upper and lower spin channels, respectively.

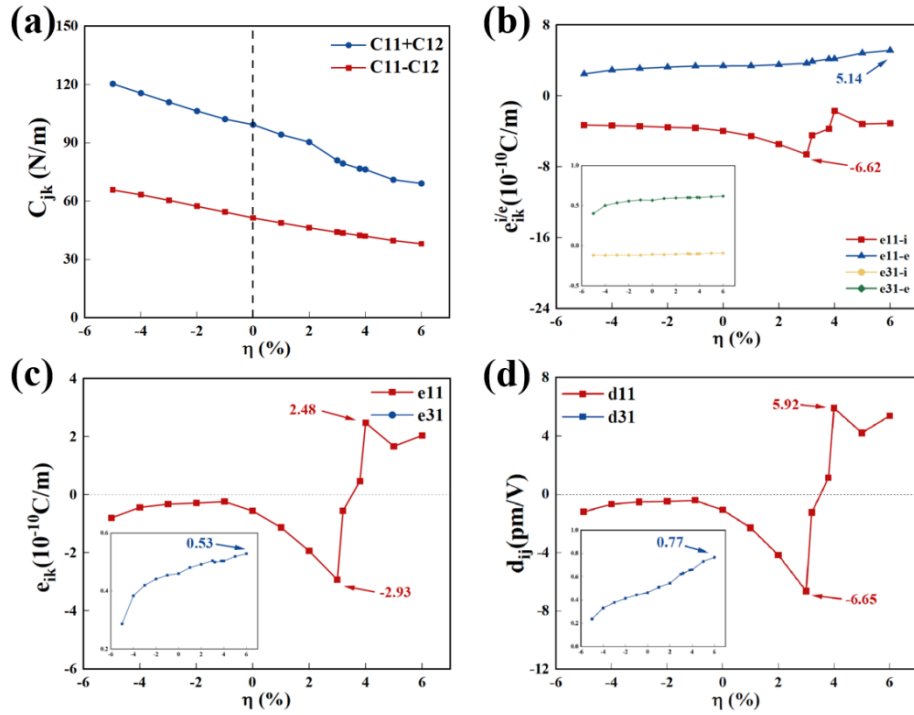

**Fig. S10.** (a) For  $\text{TiAlTe}_3$ , (a) the elastic constants  $C_{jk}$ , (b) piezoelectric stress coefficient  $e_{ik}$  along with the ionic contribution and electronic contribution, the piezoelectric stress coefficient  $e_{ik}$  and (d) piezoelectric coefficient  $d_{ij}$  as a function of strain.
